# Supplementary material for: Coupling of pupil- and neuronal population dynamics reveals diverse influences of arousal on cortical processing
Source: eLife journal article supplement (doi:10.7554/elife.71890), 2022-02-08

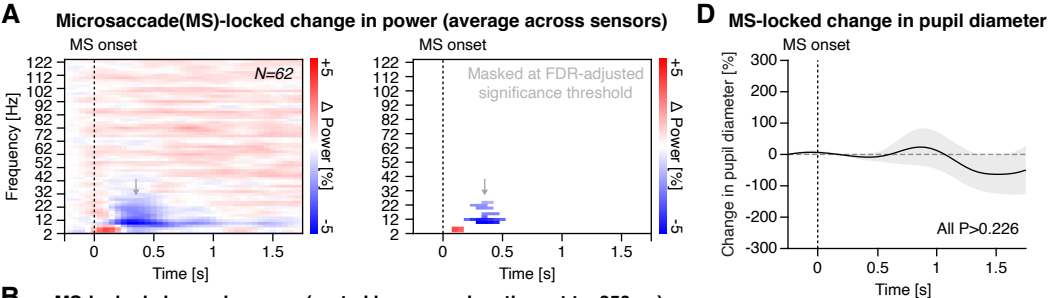

**B** MS-locked change in power (sorted by sensor location; at  $t = 350$ ms)

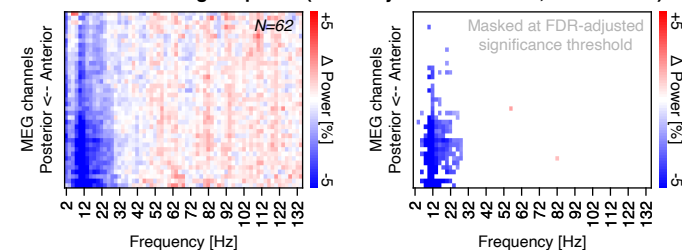

**C** Correlation between change in pupil diameter and change in power

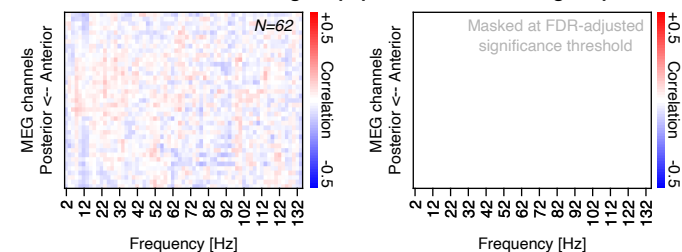

Supplement: supp [file elife_poa_e71890_Figure_2_figure_supplement_1.pdf › elife_poa_e71890_Figure_2_figure_supplement_1.pdf]
