# Supplementary figures and images for: Coupling of pupil- and neuronal population dynamics reveals diverse influences of arousal on cortical processing
Source: eLife journal article supplement (doi:10.7554/elife.71890), 2022-02-08

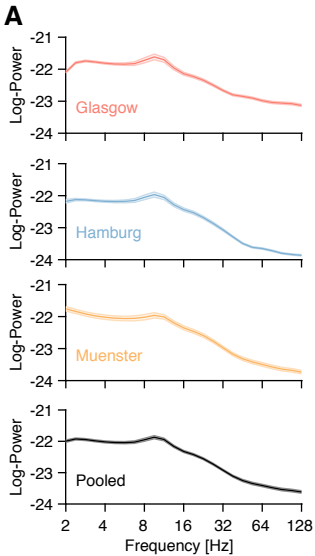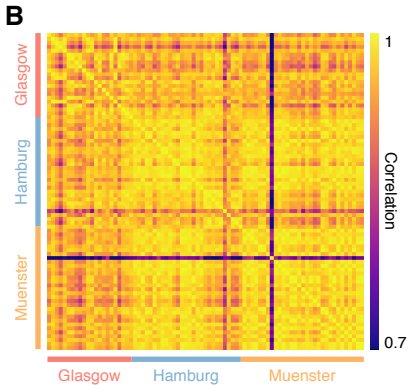

Supplement: supp [file elife_poa_e71890_Figure_1_figure_supplement_1.pdf › elife_poa_e71890_Figure_1_figure_supplement_1.pdf]

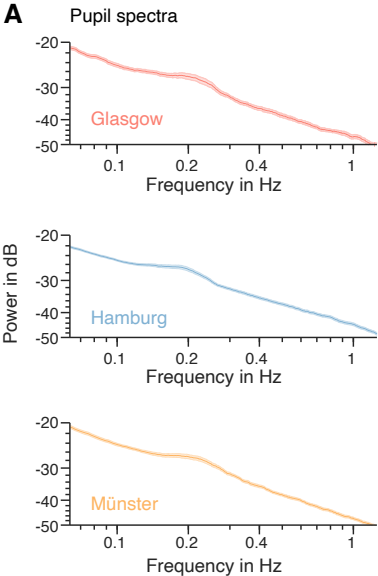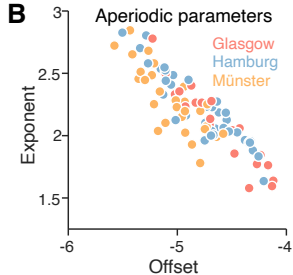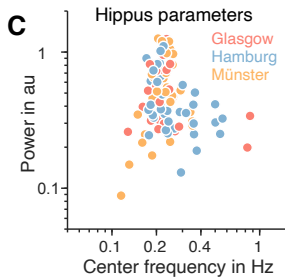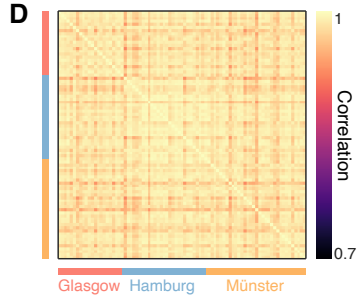

Supplement: supp [file elife_poa_e71890_Figure_1_figure_supplement_2.pdf › elife_poa_e71890_Figure_1_figure_supplement_2.pdf]

**A**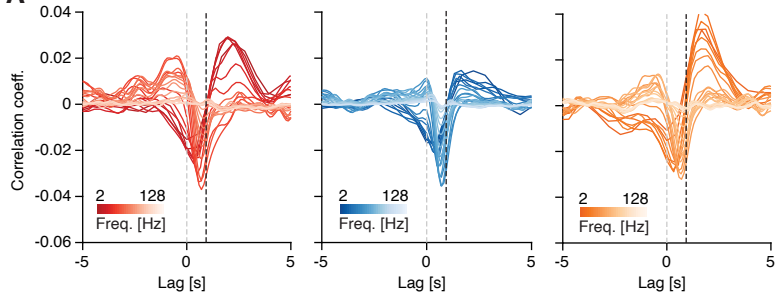**B**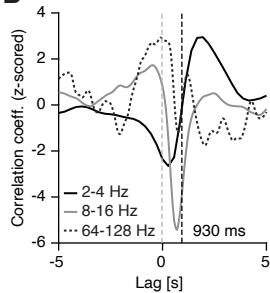**C**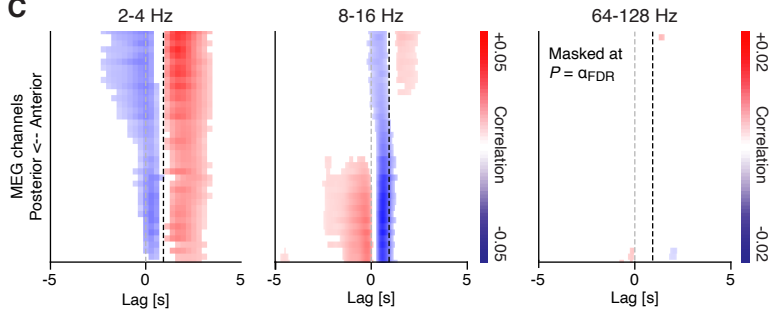

Supplement: supp [file elife_poa_e71890_Figure_3_figure_supplement_1.pdf › elife_poa_e71890_Figure_3_figure_supplement_1.pdf]

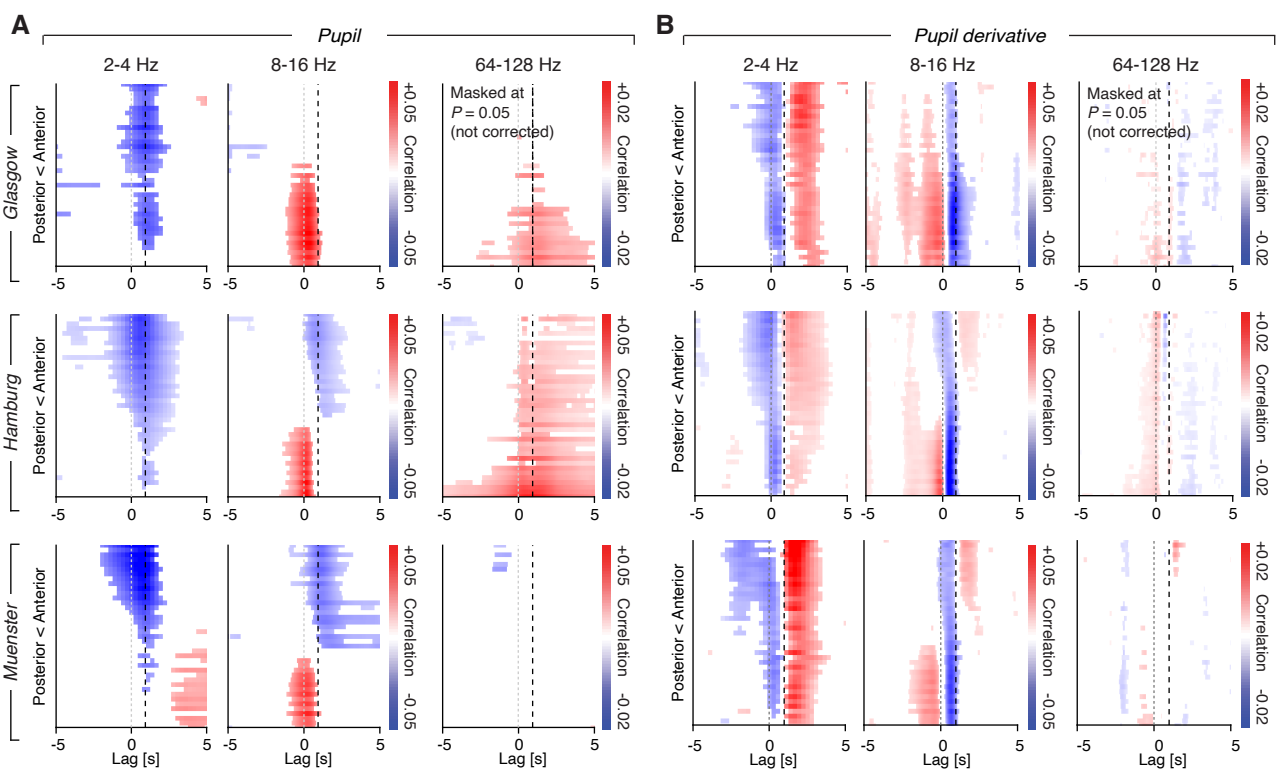

Supplement: supp [file elife_poa_e71890_Figure_3_figure_supplement_2.pdf › elife_poa_e71890_Figure_3_figure_supplement_2.pdf]

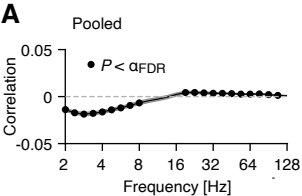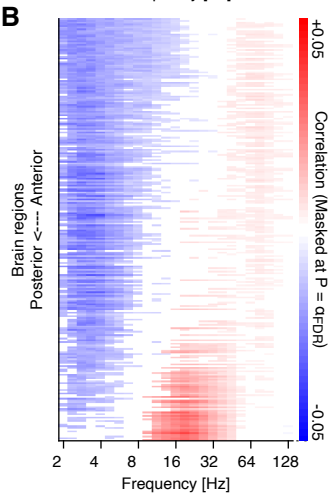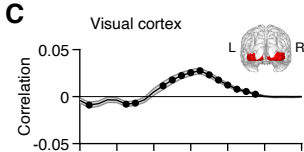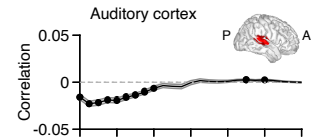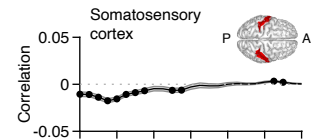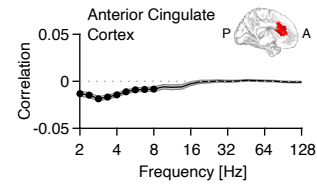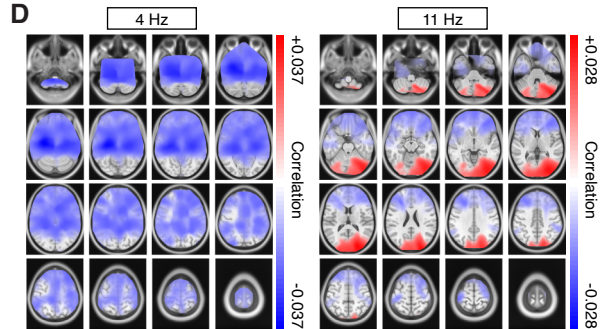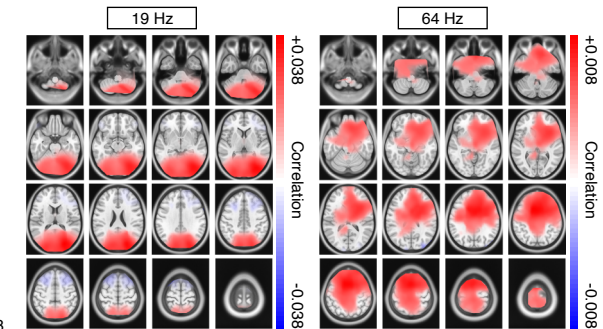

Masked at FDR-adjusted significance threshold

Supplement: supp [file elife_poa_e71890_Figure_4_figure_supplement_1.pdf › elife_poa_e71890_Figure_4_figure_supplement_1.pdf]

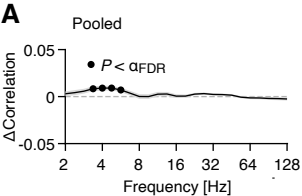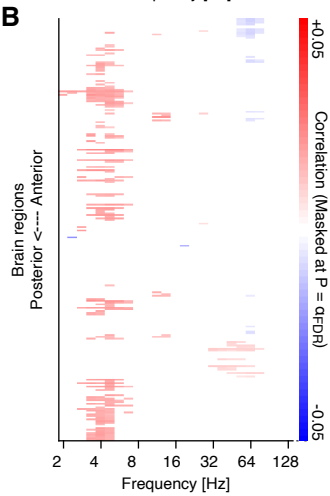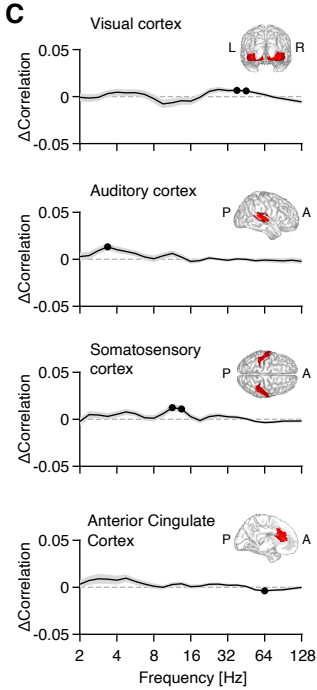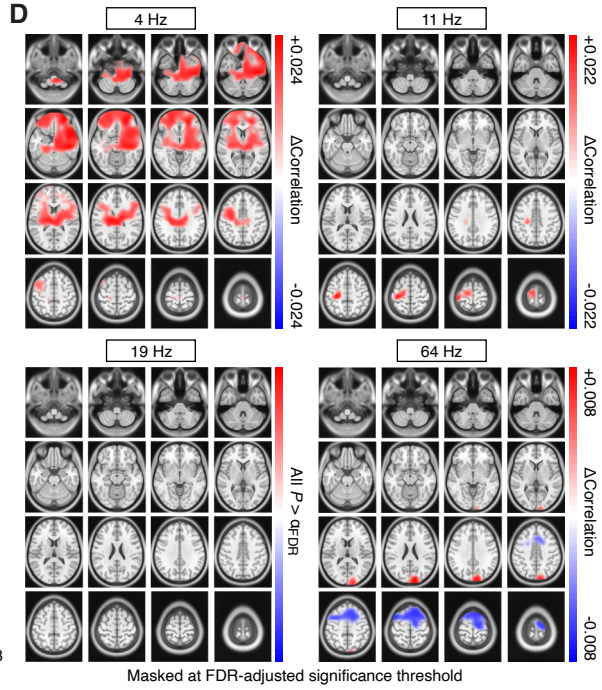

Supplement: supp [file elife_poa_e71890_Figure_4_figure_supplement_2.pdf › elife_poa_e71890_Figure_4_figure_supplement_2.pdf]

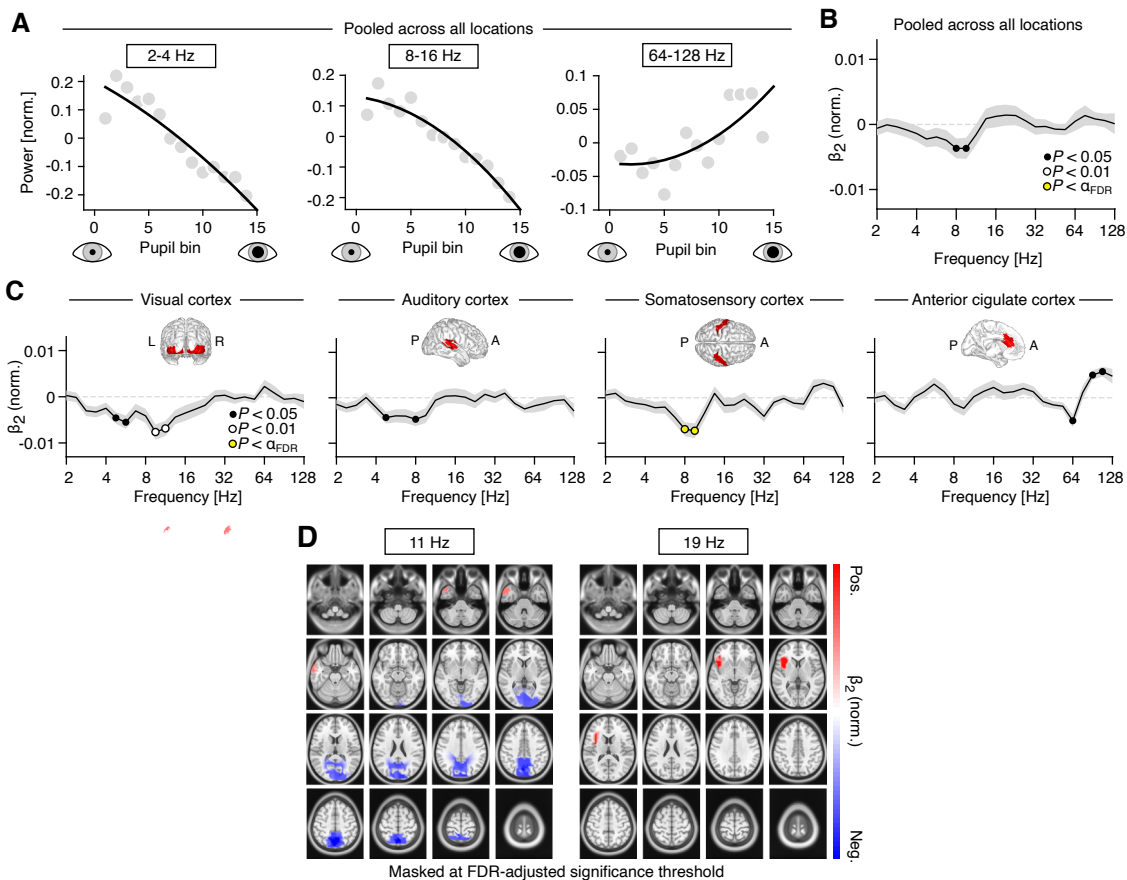

Supplement: supp [file elife_poa_e71890_Figure_5_figure_supplement_1.pdf › elife_poa_e71890_Figure_5_figure_supplement_1.pdf]

**A**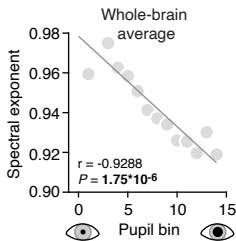**B**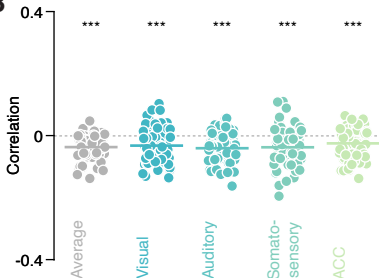**C**

Correlation  
(Pupil derivative, spectral exponent)

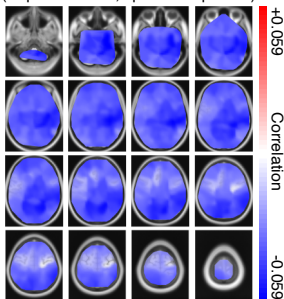

Masked at  $P = \alpha_{FDR}$

**D**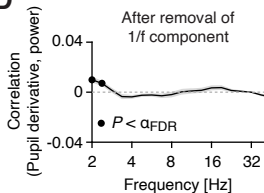

Supplement: supp [file elife_poa_e71890_Figure_6_figure_supplement_1.pdf › elife_poa_e71890_Figure_6_figure_supplement_1.pdf]
